# Supplementary material for: Antidiabetic Activities and GC-MS Analysis of 4-Methoxychalcone
Source: MDPI journal article supplement (doi:10.3390/appliedchem4020010), 2024-04-10
Supplement: s1 [file s1]

# Supplementary Materials: Antidiabetic Activities and GC-MS Analysis of 4-Methoxychalcone

Leonard D. R. Acho, Edinilze S. C. Oliveira, Simone B. Carneiro, Fernanda Paula A. Melo, Leilane de S. Mendonça, Renyer A. Costa, Rosivaldo S. Borges, Marcos B. Machado, Hector H. F. Koolen, Igor Rafael dos S. Magalhães and Emersom S. Lima

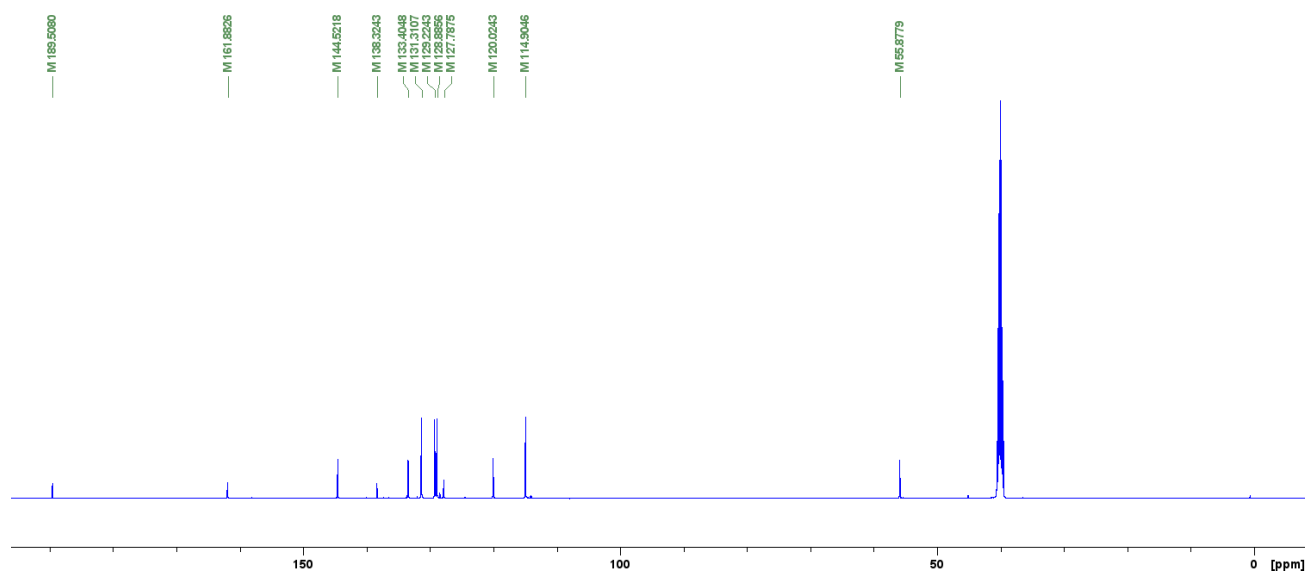

Figure S1.  $^{13}\text{C}$  spectrum of MPP (125 Mz, DMSO- $d_6$ ).

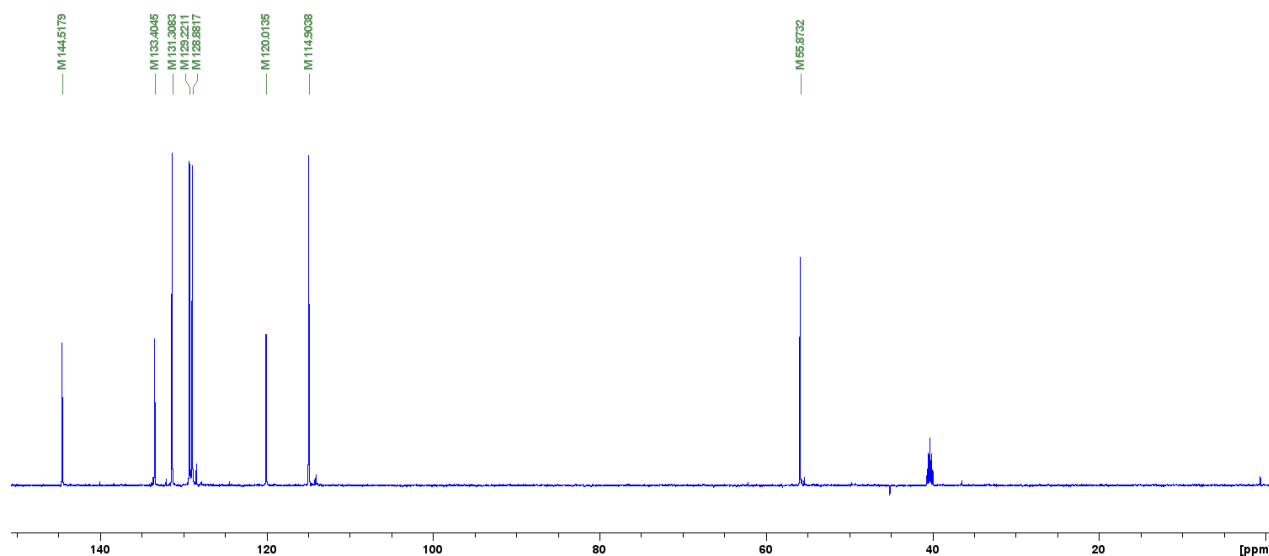

Figure S2. DEPT-135 spectrum of MPP (125 Mz, DMSO- $d_6$ ).

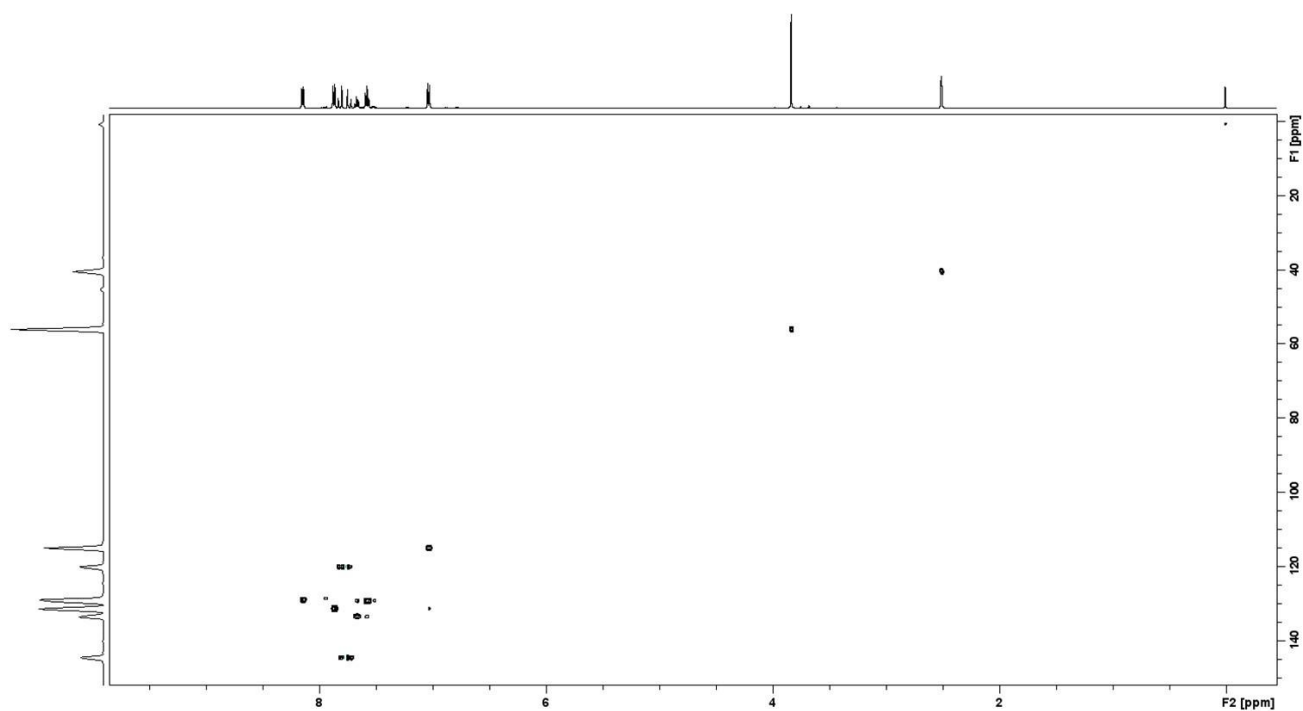

Figure S3.  $^1\text{H}$ - $^{13}\text{C}$  HSQC of MPP (11.74 T,  $\text{DMSO-}d_6$ ).

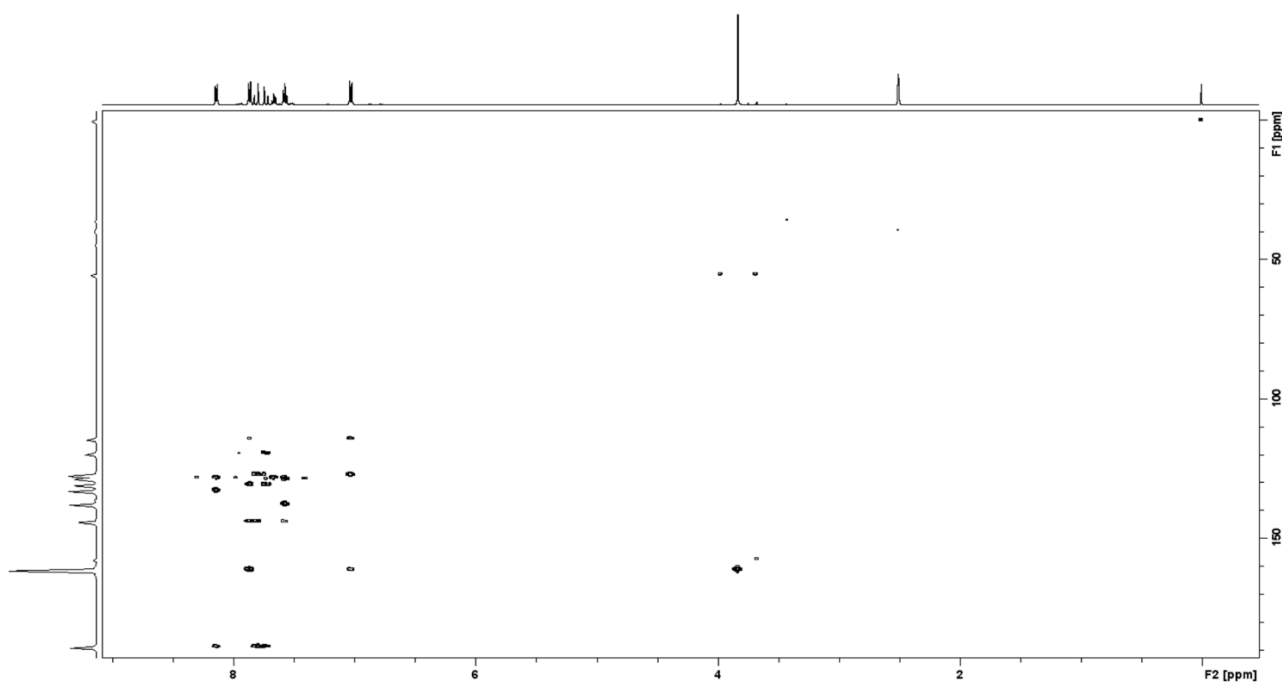

Figure S4.  $^1\text{H}$ - $^{13}\text{C}$  HMBC of MPP (11.74 T,  $\text{DMSO-}d_6$ ).

MA5\_emerson#50 RT: 0,88 AV: 1 NL: 6,71E6  
T: + c ESI Full ms2 239,000 [100,000-242,000]

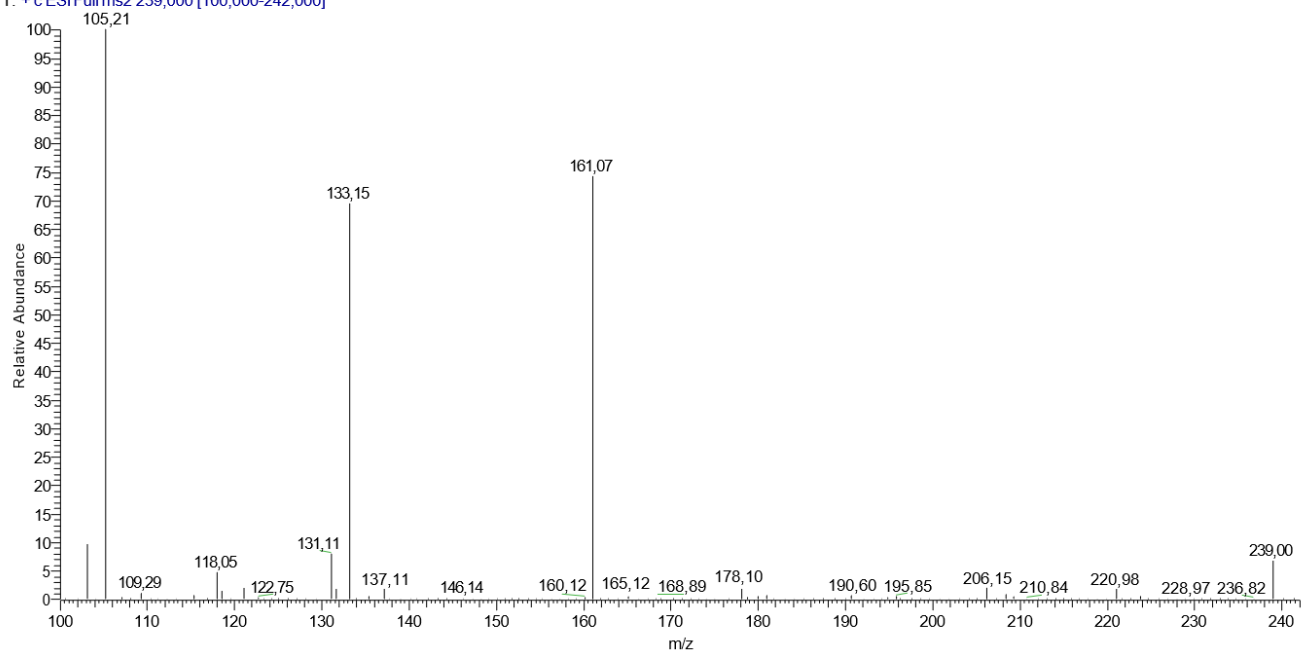

Figure S5. ESI-MS/MS spectra in positive mode of  $m/z$  239.

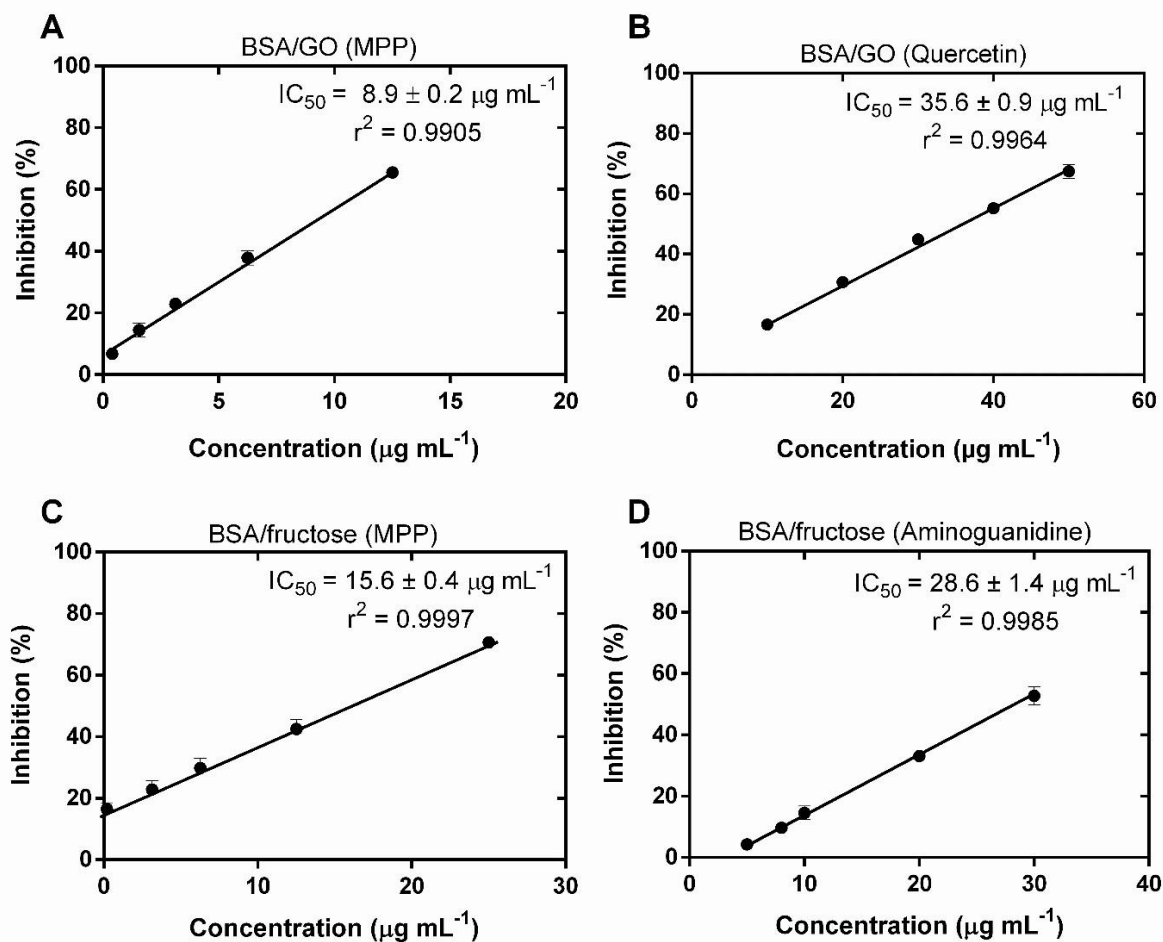

Figure S6. Antiglycant activity of MPP (A) and Quercetin (B) by the BSA/Glyoxal method. Antiglycant activity of MPP (C) and Aminoguanidine (D) by the BSA/fructose method. Results as mean  $\pm$  standard deviation of triplicates, concentration % inhibition: 100  $\mu g mL^{-1}$ .  $IC_{50}$ : 50% Inhibitory capacity in  $\mu g mL^{-1}$ .

Quantitative NMR acquisition data.

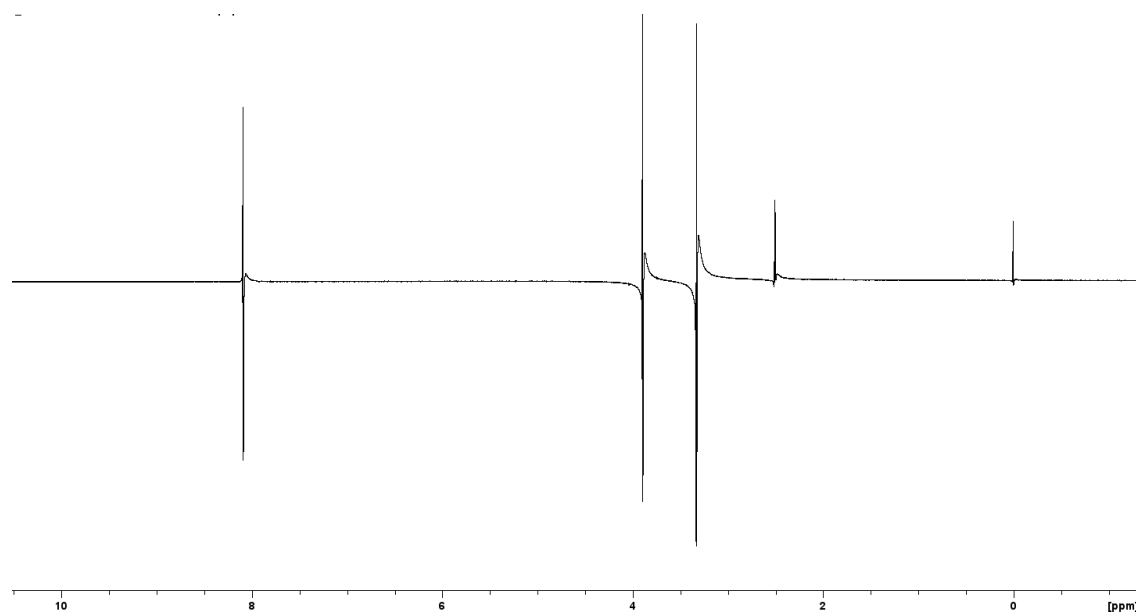

**Figure S7.** The 90° pulse experiment (zg) calibrated for the signal at  $\delta$  8.08 (s, 4H) of dimethyl terephthalate standard.

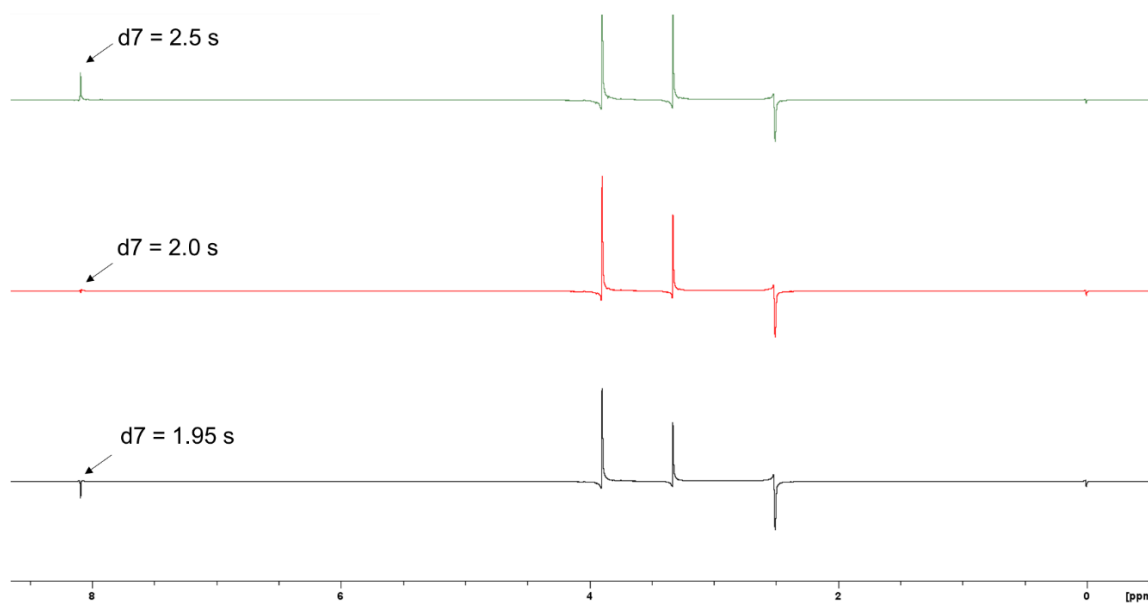

**Figure S8.** The Inversion-Recovery experiment (t1ir1d) for the signal at  $\delta$  8.08 (s, 4H) of dimethyl terephthalate standard (d1=22s).

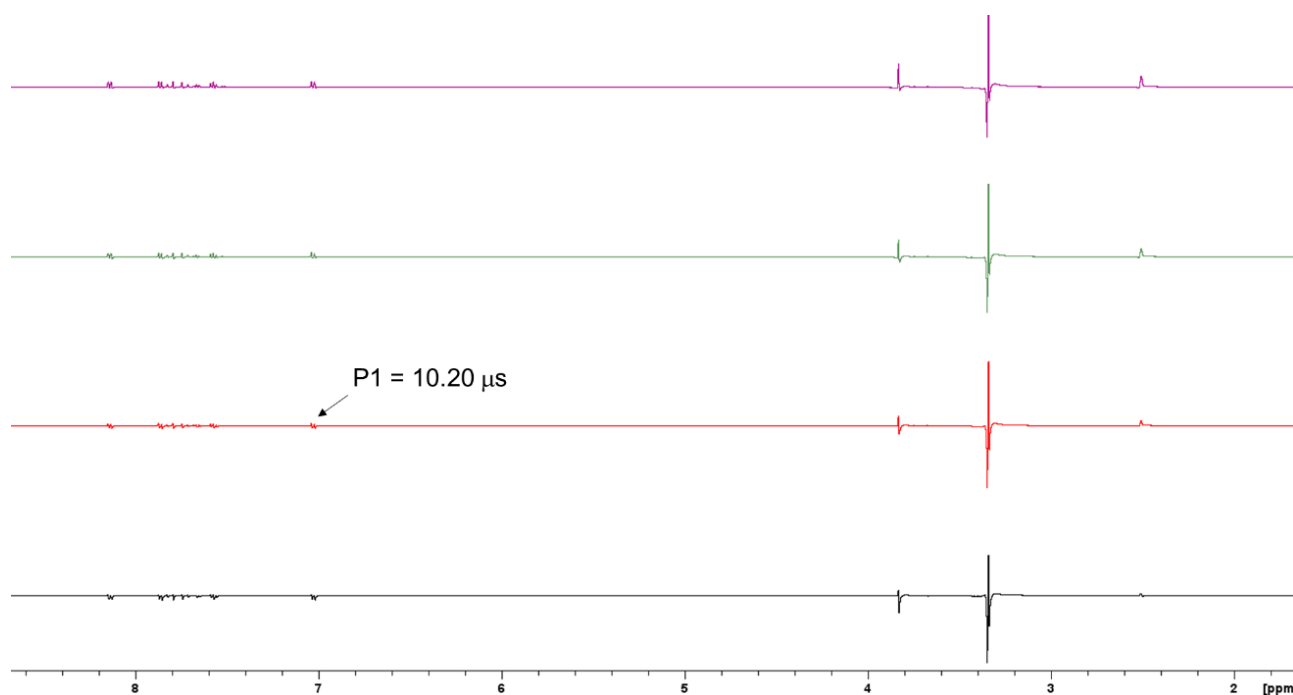

**Figure S9.** The 90° pulse experiment (zg) calibrated for the signal at  $\delta$  7.03 (*d*, 2H) of MPP (360° pulse).

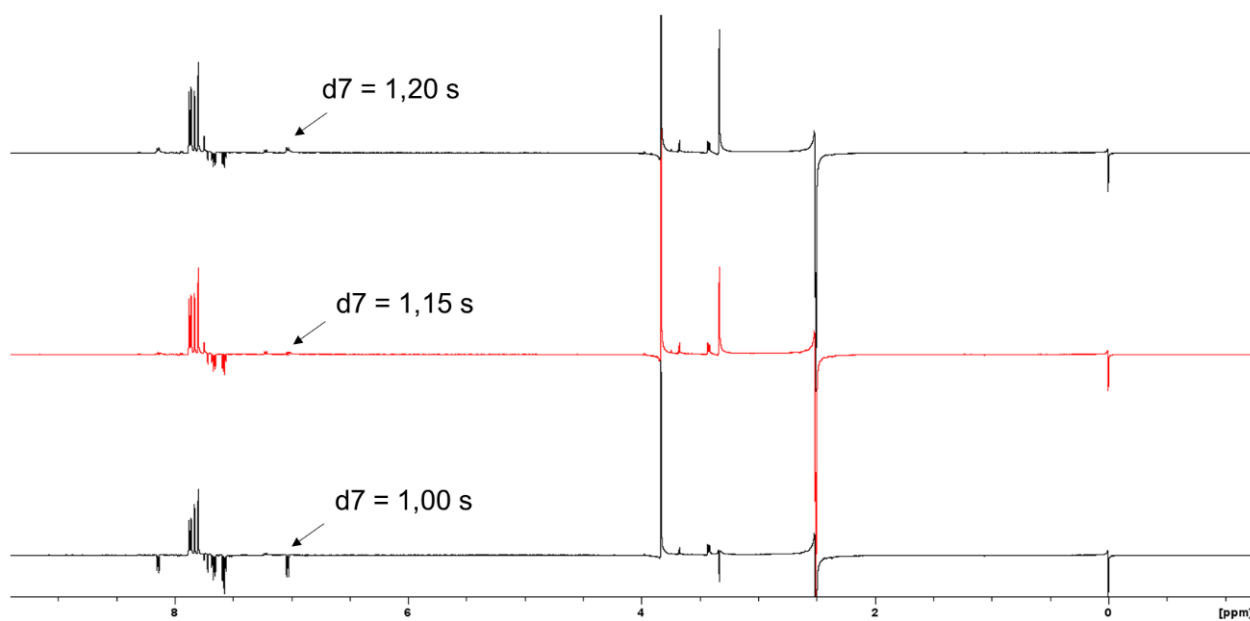

**Figure S10.** The Inversion-Recovery experiment (t1ir1d) for the signal at  $\delta$  7.03 (*s*, 2H) of MPP (d1=15s).

**Table S1.** MPP purity obtained by qNMR  $^1\text{H}$  and with the values of the absolute integrals of the TD and MPP standard; proton numbers for TD (4H) and MPP (2H); molar mass of the TD standard ( $194.1834 \text{ g mol}^{-1}$ ) and MPP ( $238.0993 \text{ g mol}^{-1}$ ); and purity of the TD standard (99.988%).

|         | Replicata | Weight of TD Standard (mg) | TD Standard Integral [abs] | Weight of MPP (mg) | MMP Integral [abs] | Calculated Purity | % RSD |
|---------|-----------|----------------------------|----------------------------|--------------------|--------------------|-------------------|-------|
| Samples | 1         | 2.94                       | 108,914.89                 | 4.80               | 73,402.33          | 97.14%            |       |
|         | 2         | 2.95                       | 110,596.59                 | 4.82               | 73,605.85          | 95.99%            |       |
|         | 3         | 3.01                       | 115,618.23                 | 4.80               | 73,709.48          | 95.84%            |       |
| Average |           |                            |                            |                    |                    | 96.32%            | 0.73% |

TD: tereftalato de dimetila external standard. MPP: (*E*)-3-(4-methoxyphenyl)-1-phenylprop-2-en-1-one.

**Table S2.** Pharmacokinetic parameters of MPP.

| Physical Chemical Properties | Result             | Parameters |
|------------------------------|--------------------|------------|
| Molecular weight             | 238.28g/mol        | <500       |
| Number of heavy atoms        | 18                 |            |
| Aroma number. heavy atoms    | 12                 |            |
| Number of rotating titles    | 4                  | ≤10        |
| Number H-bond acceptors      | 2                  | ≤10        |
| Number H-bond donors         | 0                  | ≤5         |
| TPSA                         | 26.30Å             | ≤140 Å     |
| Csp3 fraction                | 0.06               |            |
| Log P o/w                    | 3.27               | ≤5         |
| Log S (SILICOS-IT)           | Moderately soluble |            |
| Gastrointestinal Absorption  | High               |            |
| BBB permeant                 | Yes                |            |
| P-gp substrate               | No                 |            |
| Bioavailability score        | 55%                |            |
